# Supplementary material for: Diffusion Tensor and Dynamic Contrast-Enhanced Magnetic Resonance Imaging Correlate with Molecular Markers of Inflammation in the Synovium
Source: MDPI journal article supplement (doi:10.3390/diagnostics12123041), 2022-12-05
Supplement: s1 [file s1]

**Table S1: Correlation between different DTI and DCE parameters and different severities of inflammation based on Rooney synovitis score**

| S.No. | Parameter | Mild inflammation<br>(Rooney score 0-1.5)<br>n=16 |              | Moderate inflammation<br>(Rooney score 1.6-3.0)<br>n=27 |              | Severe Inflammation<br>(Rooney score 3.1-5.0)<br>n=37 |              |
|-------|-----------|---------------------------------------------------|--------------|---------------------------------------------------------|--------------|-------------------------------------------------------|--------------|
|       |           | correlation                                       | significance | correlation                                             | significance | correlation                                           | significance |
| 1     | FA        | .518                                              | .024         | .764                                                    | .000*        | .927                                                  | .000*        |
| 2     | MD        | -.505                                             | .027         | -.255                                                   | .095         | -.435                                                 | .004*        |
| 3     | Kep       | .042                                              | .441         | -.004                                                   | .493         | .571                                                  | .000*        |
| 4     | BF        | -.127                                             | .326         | .408                                                    | .016         | .594                                                  | .000*        |
| 5     | CL        | .155                                              | .291         | .075                                                    | .353         | .638                                                  | .000*        |
| 6     | CP        | .138                                              | .311         | .083                                                    | .337         | .260                                                  | .063         |
| 7     | CS        | -.159                                             | .285         | -.055                                                   | .391         | -.397                                                 | .008         |
| 8     | BV        | .113                                              | .345         | .311                                                    | .054         | .519                                                  | .001*        |

\*Correlation is significant at  $p < 0.005$  (as per Bonferroni correction)

FA: Fractional Anisotropy, MD: Mean Diffusivity, CL: Linear anisotropy, CP: Planar anisotropy, CS: Spherical isotropy, BV: Blood Volume, BF: Blood Flow, k ep: Volume transfer constant

**Table S2. Correlation between the values of DTI & DCE –MRI indices with various infiltrating immune cells in the synovium of different group of arthritis patients (n=80). Results are expressed as R values.**

| <b>RA (n=6)</b>                   | <b>Infiltrated Immune cells in synovium</b> |        |        |        |       |       |        |        |               |              |                          |
|-----------------------------------|---------------------------------------------|--------|--------|--------|-------|-------|--------|--------|---------------|--------------|--------------------------|
| <b>DTI &amp; DCE-MRI Indices</b>  | CD3                                         | CD 4   | CD 8   | CD 20  | CD34  | CD 68 | CD 138 | CD 54  | TNF- $\alpha$ | IL-1 $\beta$ | Total Inflammatory cells |
| FA                                | 0.38*                                       | 0.48*  | 0.67** | 0.39*  | 0.42* | 0.42* | 0.80*  | 0.46** | 0.23          | 0.48*        | 0.72**                   |
| MD                                | 0.01                                        | -0.50* | 0.04   | -0.58* | -0.34 | 0.46  | -0.32* | 0.36   | 0.27          | -0.08        | -0.40*                   |
| CL                                | 0.55*                                       | 0.02   | 0.40   | 0.28   | 0.32  | 0.08  | 0.83*  | 0.24   | 0.13          | 0.02         | 0.08                     |
| CP                                | 0.38                                        | 0.78   | 0.15   | 0.58   | 0.21  | 0.03  | 0.45   | 0.55   | 0.48          | 0.03         | 0.19                     |
| CS                                | 0.07                                        | -0.46* | -0.42  | -0.79  | 0.22  | -0.33 | 0.76   | 0.76   | -0.57         | 0.27         | 0.44                     |
| BF                                | 0.32                                        | 0.22   | 0.52*  | 0.34   | 0.85* | 0.32  | 0.44*  | 0.42   | 0.23          | 0.32         | 0.53*                    |
| BV                                | 0.21                                        | 0.53   | 0.32   | 0.33   | 0.85* | 0.42  | 0.41   | 0.12   | 0.22          | 0.54*        | 0.47*                    |
| kep                               | 0.12                                        | 0.23   | 0.53   | 0.42   | 0.77* | 0.32  | 0.31   | 0.42   | 0.43*         | 0.32*        | 0.43                     |
| PCI                               | 0.56                                        | 0.23   | -0.01  | 0.14   | -0.28 | 0.46  | 0.55   | 0.66   | 0.35          | 0.68         | 0.68                     |
| <b>Infective Arthritis (n=19)</b> |                                             |        |        |        |       |       |        |        |               |              |                          |
| FA                                | 0.56*                                       | 0.51*  | 0.88*  | 0.30   | 0.45* | 0.70* | 0.33   | 0.22   | 0.31          | 0.78*        | 0.86**                   |

|                    |        |       |        |       |        |        |       |       |        |       |        |
|--------------------|--------|-------|--------|-------|--------|--------|-------|-------|--------|-------|--------|
| MD                 | -0.52* | -0.12 | -0.63* | 0.12  | -0.43  | 0.10   | -0.13 | 0.03  | 0.08   | 0.76* | -0.58* |
| CL                 | 0.62*  | 0.32  | 0.42   | 0.33  | 0.21   | -0.36  | 0.40  | 0.16  | 0.09   | 0.57  | 0.75*  |
| CP                 | 0.16   | -0.27 | -0.15  | 0.31  | 0.11   | 0.23   | 0.19  | -0.12 | -0.17  | 0.11  | 0.17*  |
| CS                 | -0.12  | 0.15  | -0.08  | 0.05  | 0.23   | -0.13  | -0.20 | -0.19 | -0.05  | -0.21 | -0.25  |
| BF                 | 0.32   | 0.12  | 0.34   | 0.11  | 0.89** | 0.23   | 0.34  | 0.11  | 0.41   | 0.12  | 0.45*  |
| BV                 | 0.41   | 0.32  | 0.12   | 0.18  | 0.93** | 0.14   | 0.42  | 0.17  | 0.31   | 0.15  | 0.49*  |
| k ep               | 0.31   | 0.33  | 0.15   | 0.17  | 0.27   | 0.24   | 0.32  | 0.12  | 0.01   | 0.33  | 0.34   |
| PCI                | -0.33  | -0.13 | -0.14  | -0.14 | -0.08  | -0.35  | 0.09  | -0.03 | -0.1   | -0.28 | -0.48  |
| <b>USpA (n=14)</b> |        |       |        |       |        |        |       |       |        |       |        |
| FA                 | 0.68*  | 0.58* | 0.75*  | -0.07 | 0.43*  | 0.73*  | 0.16  | 0.51* | 0.30   | 0.10  | 0.81** |
| MD                 | -0.58* | -0.29 | -0.45* | 0.23  | -0.45  | -0.42* | 0.08  | -0.14 | 0.05   | -0.16 | -0.63* |
| CL                 | 0.57*  | 0.49  | 0.00   | 0.54* | 0.12   | 0.49*  | 0.34  | 0.14  | 0.14   | 0.17  | 0.14   |
| CP                 | 0.45   | 0.23  | 0.28   | 0.48  | 0.14   | 0.27   | 0.14  | 0.23  | 0.47   | 0.08  | 0.36   |
| CS                 | -0.27  | -0.40 | -0.29  | 0.54* | 0.21   | -0.56* | 0.57* | -0.15 | -0.61* | -0.39 | -0.23  |
| BF                 | 0.45*  | 0.32  | 0.45   | 0.44  | 0.82** | 0.42   | 0.24  | 0.34  | 0.54*  | 0.11  | 0.34*  |
| BV                 | 0.31   | 0.43  | 0.56*  | 0.44  | 0.85** | 0.35   | 0.335 | 0.12  | 0.34   | 0.24  | 0.45*  |

|                    |        |       |       |        |        |        |        |         |       |       |        |
|--------------------|--------|-------|-------|--------|--------|--------|--------|---------|-------|-------|--------|
| k ep               | 0.11   | 0.23  | 0.24  | 0.15   | 0.34   | 0.46   | 0.32   | 0.21    | 0.33  | 0.25  | 0.25   |
| PCI                | -0.40  | -0.06 | -0.11 | 0.12   | 0.01   | -0.30  | -0.07  | -0.67** | -0.10 | 0.23  | -0.43  |
| <b>UCMA (n=31)</b> |        |       |       |        |        |        |        |         |       |       |        |
| FA                 | 0.64*  | 0.76* | 0.31  | 0.27   | 0.22   | 0.30   | 0.16   | 0.33    | 0.11  | 0.08  | 0.77** |
| MD                 | -0.51* | -0.16 | -0.16 | -0.48* | 0.31   | 0.29   | 0.05   | 0.00    | 0.19  | 0.00  | -0.49* |
| CL                 | 0.36   | -0.09 | -0.12 | -0.04  | 0.35   | 0.29   | -0.07  | 0.04    | 0.18  | 0.24  | 0.27   |
| CP                 | -0.25  | 0.05  | -0.03 | 0.13   | 0.17   | -0.43  | 0.11   | 0.14    | -0.23 | -0.43 | -0.21  |
| CS                 | 0.30   | -0.01 | 0.39  | 0.11   | 0.11   | 0.25   | 0.62** | 0.37    | 0.29  | 0.01  | 0.55*  |
| BF                 | 0.35   | 0.46* | 0.51* | 0.32   | 0.66** | 0.33   | 0.38   | 0.35    | 0.11  | 0.14  | 0.64*  |
| BV                 | 0.37*  | 0.44* | 0.53* | 0.54*  | 0.70** | 0.13   | 0.17   | 0.06    | 0.42  | 0.29  | 0.56*  |
| k ep               | 0.23   | 0.15  | 0.22  | 0.15   | 0.35   | 0.15   | 0.15   | 0.07    | 0.54  | 0.35  | 0.46   |
| PCI                | -0.40  | 0.06  | -0.11 | 0.12   | 0.50   | -0.30  | 0.07   | -0.67** | 0.23  | -0.10 | -0.43  |
| <b>OA (n=4)</b>    |        |       |       |        |        |        |        |         |       |       |        |
| FA                 | 0.42   | 0.53* | 0.43  | 0.75   | 0.34   | 0.78** | 0.72** | 0.75*   | 0.55  | 0.82  | 0.84** |
| MD                 | -0.58  | -0.68 | -0.93 | 0.02   | 0.44*  | -0.27  | -0.66  | 0.05    | -0.44 | 0.15  | -0.61* |
| CL                 | 0.55*  | 0.02  | 0.70* | 0.28   | 0.23   | 0.08   | 0.83*  | 0.24    | 0.08  | 0.23  | 0.08   |
| CP                 | 0.38   | -0.78 | 0.15  | 0.58   | 0.15   | -0.03  | -0.45  | 0.55    | 0.48  | 0.03  | 0.19   |

|                     |       |        |       |       |       |        |       |       |       |       |        |
|---------------------|-------|--------|-------|-------|-------|--------|-------|-------|-------|-------|--------|
| CS                  | 0.07  | -0.46* | 0.42  | 0.28  | 0.19  | 0.33   | 0.76  | 0.76  | 0.57  | 0.27  | 0.44   |
| BF                  | 0.24  | 0.56   | 0.22  | 0.35  | 0.68* | 0.31   | 0.18  | 0.26  | 0.33  | 0.17  | 0.25   |
| BV                  | 0.15  | 0.31   | 0.15  | 0.23  | 0.86* | 0.21   | 0.22  | 0.42  | 0.24  | 0.27  | 0.46   |
| k ep                | 0.04  | 0.04   | 0.13  | 0.22  | 0.13  | 0.22   | 0.16  | 0.31  | 0.17  | 0.15  | 0.11   |
| PCI                 | -0.61 | 0.19   | 0.61  | -0.61 | 0.48  | -0.54  | -0.12 | -0.64 | -0.88 | -0.85 | -0.81  |
| <b>Others (n=6)</b> |       |        |       |       |       |        |       |       |       |       |        |
| FA                  | 0.60* | 0.85** | 0.41  | 0.00  | 0.24  | 0.81** | 0.72* | 0.28  | -0.86 | 0.85  | 0.66** |
| MD                  | -0.24 | -0.36  | 0.34  | .87   | 0.28  | -0.61  | -0.36 | -0.80 | 0.23  | 0.64  | -0.37  |
| CL                  | 0.42  | -0.47  | 0.43  | -0.16 | 0.16  | -0.01  | 0.19  | 0.41  | -0.49 | 0.22  | 0.34   |
| CP                  | -0.57 | -0.56  | -0.22 | 0.41  | 0.21  | -0.69  | -0.17 | 0.31  | 0.18  | 0.35  | -0.62  |
| CS                  | 0.13  | 0.25   | 0.40  | 0.55  | 0.22  | -0.02  | -0.53 | -0.22 | -0.04 | 0.48  | 0.05   |
| BF                  | 0.17  | 0.04   | 0.52  | 0.23  | 0.74* | 0.35   | 0.11  | 0.51  | 0.12  | 0.46  | 0.31   |
| BV                  | 0.44  | 0.24   | 0.18  | 0.21  | 0.91* | 0.02   | 0.04  | 0.02  | 0.02  | 0.31  | 0.13   |
| k ep                | 0.05  | 0.34   | 0.33  | 0.26  | 0.17  | 0.03   | 0.03  | 0.02  | 0.24  | 0.16  | 0.36   |
| PCI                 | 0.64  | 0.54   | 0.92  | 0.67  | 0.80  | 0.40   | 0.19  | -0.10 | 0.62  | -0.06 | 0.56   |

\*\* correlation is significant at the 0.01 level, \* Correlation is significant at 0.05 level

RA: Rheumatoid arthritis, USpA: Undifferentiated spondyloarthropathy, UCMA: undifferentiated chronic monoarthritis, OA, Osteoarthritis, FA: Fractional Anisotropy, MD: Mean Diffusivity, CL: Linear anisotropy, CP: Planar anisotropy, CS: Spherical isotropy, BV: Blood Volume, BF: Blood Flow,  $k_{ep}$ : Volume transfer constant, PCI: post-contrast signal intensity

**Table S3. Correlation between the values of DTI and DCE –MRI indices with various cytokines in the synovial fluid of different group of arthritis patients (n=80). Results are expressed as R values**

| DTI & DCE-MRI Indices | Proinflammatory Cytokines in synovial fluid |                               |             |                                |                               |             |                                |                               |             |                                |                               |             |                                |                               |             |                                |                               |             |
|-----------------------|---------------------------------------------|-------------------------------|-------------|--------------------------------|-------------------------------|-------------|--------------------------------|-------------------------------|-------------|--------------------------------|-------------------------------|-------------|--------------------------------|-------------------------------|-------------|--------------------------------|-------------------------------|-------------|
|                       | RA (n=6)                                    |                               |             | Infective Arthritis (n=19)     |                               |             | USpA (n= 14)                   |                               |             | UCMA (n=31)                    |                               |             | OA (n=4)                       |                               |             | Others (n=6)                   |                               |             |
|                       | <i>TNF-<math>\alpha</math></i>              | <i>IL-1<math>\beta</math></i> | <i>IL-6</i> | <i>TNF-<math>\alpha</math></i> | <i>IL-1<math>\beta</math></i> | <i>IL-6</i> | <i>TNF-<math>\alpha</math></i> | <i>IL-1<math>\beta</math></i> | <i>IL-6</i> | <i>TNF-<math>\alpha</math></i> | <i>IL-1<math>\beta</math></i> | <i>IL-6</i> | <i>TNF-<math>\alpha</math></i> | <i>IL-1<math>\beta</math></i> | <i>IL-6</i> | <i>TNF-<math>\alpha</math></i> | <i>IL-1<math>\beta</math></i> | <i>IL-6</i> |
| <b>FA</b>             | 0.15                                        | 0.63**                        | 0.18        | 0.37*                          | 0.34*                         | 0.06        | 0.49**                         | 0.10                          | -0.13       | 0.46**                         | 0.39*                         | 0.49*       | 0.23                           | 0.42**                        | 0.87*       | 0.82*                          | 0.12                          | 0.27        |
| <b>MD</b>             | -0.61*                                      | -0.44*                        | -0.96       | 0.00                           | -0.01                         | 0.30        | -0.56*                         | -0.06                         | 0.02        | -0.31*                         | 0.36*                         | -0.48*      | -0.57                          | -0.62*                        | 0.54        | -0.54                          | 0.38                          | -0.74       |
| <b>CL</b>             | 0.35                                        | 0.23                          | -0.20       | 0.35*                          | 0.23                          | 0.20        | 0.08                           | 0.22                          | 0.04        | 0.22                           | 0.44*                         | 0.33        | 0.18                           | 0.40                          | 0.17        | -0.58                          | 0.24                          | 0.38        |
| <b>CP</b>             | -0.20                                       | 0.00                          | 0.24        | -0.20                          | 0.00                          | 0.24        | -0.49                          | 0.20                          | -0.00       | 0.30                           | -0.35                         | -0.33       | -0.91                          | -0.31                         | 0.24        | 0.38                           | 0.19                          | 0.91        |
| <b>CS</b>             | 0.12                                        | -0.19                         | -0.01       | 0.12                           | -0.18                         | 0.01        | 0.07                           | 0.31                          | 0.37        | -0.02                          | 0.03                          | 0.21        | -0.70                          | 0.33                          | -0.16       | -0.16                          | 0.52*                         | 0.14        |
| <b>BF</b>             | 0.12                                        | 0.32                          | 0.21        | 0.31                           | 0.11                          | 0.28        | 0.07                           | 0.08                          | 0.03        | 0.01                           | 0.08                          | 0.04        | 0.02                           | 0.34                          | 0.32        | 0.42                           | 0.32                          | 0.22        |
| <b>BV</b>             | 0.24                                        | 0.03                          | 0.06        | 0.08                           | 0.03                          | 0.02        | 0.31                           | 0.22                          | 0.16        | 0.32                           | 0.23                          | 0.21        | 0.35                           | 0.23                          | 0.11        | 0.31                           | 0.32                          | 0.21        |
| <b>k ep</b>           | 0.44                                        | 0.20                          | 0.10        | 0.34                           | 0.22                          | 0.15        | 0.17                           | 0.01                          | 0.17        | 0.19                           | 0.05                          | 0.04        | 0.23                           | 0.03                          | 0.44        | 0.16                           | 0.34                          | 0.27        |
| <b>PCI</b>            | 0.03                                        | 0.42                          | 0.14        | 0.03                           | 0.42                          | 0.14        | -0.25                          | 0.26                          | 0.07        | 0.32                           | -0.03                         | -0.15       | 0.31                           | 0.57*                         | 0.27        | 0.22                           | 0.54                          | 0.14        |

\*\* correlation is significant at the 0.01 level, \* Correlation is significant at 0.05 level

RA: Rheumatoid arthritis, USpA: Undifferentiated spondyloarthropathy, UCMA: undifferentiated chronic monoarthritis, OA, Osteoarthritis, FA: Fractional Anisotropy, MD: Mean Diffusivity, CL: Linear anisotropy, CP: Planar anisotropy, CS: Spherical isotropy, BV: Blood Volume, BF: Blood Flow,  $k_{ep}$ : Volume transfer constant, PCI: post-contrast signal intensity



**Table S4 : Multivariate linear regression for predicting Total cells infiltrating the synovium as dependent variable and DTI and DCE metrics as independent variables**

| Model |            | Unstandardized Coefficients |            | Standardized Coefficients | t      | Sig.     | R     | R Square | Std error of the estimate | Sig. F Change |
|-------|------------|-----------------------------|------------|---------------------------|--------|----------|-------|----------|---------------------------|---------------|
|       |            | B                           | Std. Error | Beta                      |        |          |       |          |                           |               |
| 1     | (Constant) | -203.454                    | 35.285     |                           | -5.766 | .000     | 0.915 | 0.836    | 44.06                     | 5.31E-32      |
|       | FA         | 3138.043                    | 158.157    | .915                      | 19.841 | 5.31E-32 |       |          |                           |               |
| 2     | (Constant) | -600.417                    | 171.327    |                           | -3.505 | .001     | 0.921 | 0.848    | 42.81                     | 0.021         |
|       | FA         | 3277.215                    | 164.528    | .955                      | 19.919 | 6.8E-32  |       |          |                           |               |
|       | CS         | 486.244                     | 205.617    | .113                      | 2.365  | .021     |       |          |                           |               |
| 3     | (Constant) | -642.382                    | 167.546    |                           | -3.834 | .000     | 0.926 | 0.858    | 41.62                     | 0.023         |
|       | FA         | 3101.497                    | 176.925    | .904                      | 17.530 | 3.04E-28 |       |          |                           |               |
|       | CS         | 550.851                     | 201.832    | .128                      | 2.729  | .008     |       |          |                           |               |
|       | KEP        | 13.143                      | 5.654      | .117                      | 2.324  | .023     |       |          |                           |               |

FA; Fractional anisotropy, CS; Spherical isotropy, Kep; Volume transfer constant

**Table S5: Multivariate linear regression for predicting CD34 as dependent variable and DTI and DCE metrics as independent variables**

| Model |            | Unstandardized Coefficients |            | Standardized Coefficients | t      | Sig.     | R     | R Square | Std error of the estimate | Sig. F change |
|-------|------------|-----------------------------|------------|---------------------------|--------|----------|-------|----------|---------------------------|---------------|
|       |            | B                           | Std. Error | Beta                      |        |          |       |          |                           |               |
| 1     | (Constant) | 19.185                      | 3.431      |                           | 5.592  | .000     | 0.765 | 0.585    | 10.82                     | 2.32E-16      |
|       | BF         | .309                        | .030       | .765                      | 10.418 | 2.32E-16 |       |          |                           |               |
| 2     | (Constant) | 17.073                      | 3.155      |                           | 5.412  | .000     | 0.814 | 0.662    | 9.82                      | 0.000078      |
|       | BF         | .180                        | .041       | .444                      | 4.371  | 0.000039 |       |          |                           |               |
|       | BV         | 1.735                       | .415       | .425                      | 4.178  | 0.000078 |       |          |                           |               |

BF; Blood flow, BV; Blood volume
